# Supplementary material for: Cell permeable HMGB1-binding heptamer peptide ameliorates neurovascular complications associated with thrombolytic therapy in rats with transient ischemic stroke
Source: Springer Nature journal article supplement (doi:10.1186/s12974-018-1267-5), 2018-08-23
Supplement: MOESM1 [file 16068146]

**human**

**HMGB1**

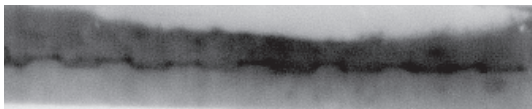

**25 kDa**

**pre-tPA**

**post-tPA**

**rats**

**HMGB1**

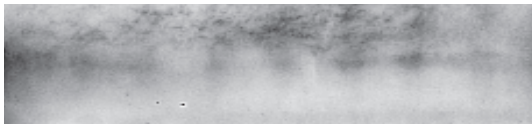

**25 kDa**

**pre-tPA**

**post-tPA**
