# Supplementary material for: Cell permeable HMGB1-binding heptamer peptide ameliorates neurovascular complications associated with thrombolytic therapy in rats with transient ischemic stroke
Source: Springer Nature journal article supplement (doi:10.1186/s12974-018-1267-5), 2018-08-23
Supplement: MOESM2 [file 16068146]

**A**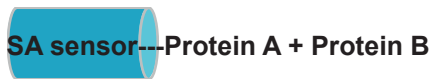**B**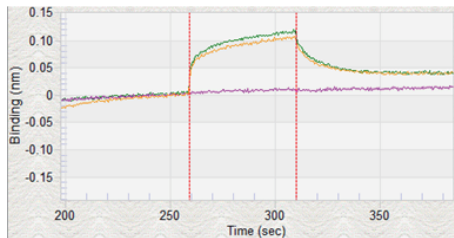

**Imobilize tPA and analyze HMGB1**  
**Mobilize tPA and analyze HMGB1**

**C**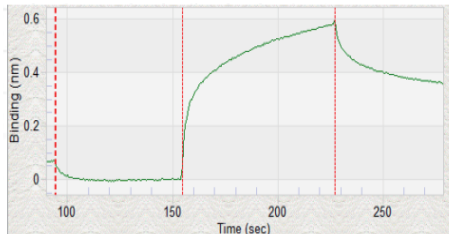

**Mobilize HBHP and analyze tPA**

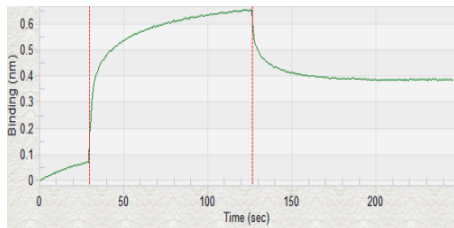

**Imobilize HBHP and analyze tPA**
